# Supplementary material
Source: HighWire-hosted journal article supplement (https://erj.ersjournals.com/content/55/4/1902079)
Supplement: inline-supplementary-material-1 [file inline-supplementary-material-1.pdf]

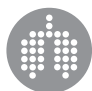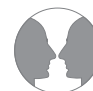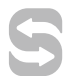

SHAREABLE PDF

# SNPs identified by GWAS affect asthma risk through DNA methylation and expression of *cis*-genes in airway epithelium

Soyeon Kim<sup>1,2,6</sup>, Erick Forno<sup>1,2,6</sup>, Qi Yan<sup>1,2</sup>, Yale Jiang<sup>1,3</sup>, Rong Zhang<sup>4</sup>, Nadia Boutaoui<sup>1,2</sup>, Edna Acosta-Pérez<sup>5</sup>, Glorisa Canino<sup>5</sup>, Wei Chen<sup>1,2,7</sup> and Juan C. Celedón<sup>1,2,7</sup>

**Affiliations:** <sup>1</sup>Division of Pediatric Pulmonary Medicine, UPMC Children's Hospital of Pittsburgh, University of Pittsburgh, Pittsburgh, PA, USA. <sup>2</sup>Dept of Pediatrics, School of Medicine, University of Pittsburgh, Pittsburgh, PA, USA. <sup>3</sup>School of Medicine, Tsinghua University, Beijing, China. <sup>4</sup>Dept of Statistics, University of Pittsburgh, Pittsburgh, PA, USA. <sup>5</sup>Behavioral Sciences Research Institute, University of Puerto Rico, San Juan, Puerto Rico. <sup>6</sup>Shared first authors. <sup>7</sup>Shared senior authors.

**Correspondence:** Juan C. Celedón, Division of Pediatric Pulmonary Medicine, UPMC Children's Hospital of Pittsburgh, 4401 Penn Avenue, Pittsburgh, PA 15224, USA. E-mail: [juan.celedon@chp.edu](mailto:juan.celedon@chp.edu)

 @ERSpublications

Many asthma-susceptibility SNPs are associated with expression of distant *cis*-genes in airway epithelium (AE) through DNA methylation. Over 40% of the genes whose expression in AE is associated with such SNPs are differentially expressed in atopic asthma. <http://bit.ly/2L1rnIk>

**Cite this article as:** Kim S, Forno E, Yan Q, *et al.* SNPs identified by GWAS affect asthma risk through DNA methylation and expression of *cis*-genes in airway epithelium. *Eur Respir J* 2020; 55: 1902079 [<https://doi.org/10.1183/13993003.02079-2019>].

This single-page version can be shared freely online.

*To the Editor:*

Over the past 12 years, many genome-wide association studies (GWAS) have been conducted to identify susceptibility variants for asthma [1–5]. The Trans-National Asthma Genetic Consortium (TAGC) recently conducted a large meta-analysis of GWAS [3], identifying 878 single nucleotide polymorphisms (SNPs) associated with asthma at 18 loci. The mechanisms underlying such associations are largely unknown but may include effects on gene expression that alter airway epithelial integrity and function.
